# Supplementary material
Source: PubMed Central journal article supplement (PMC5891125)

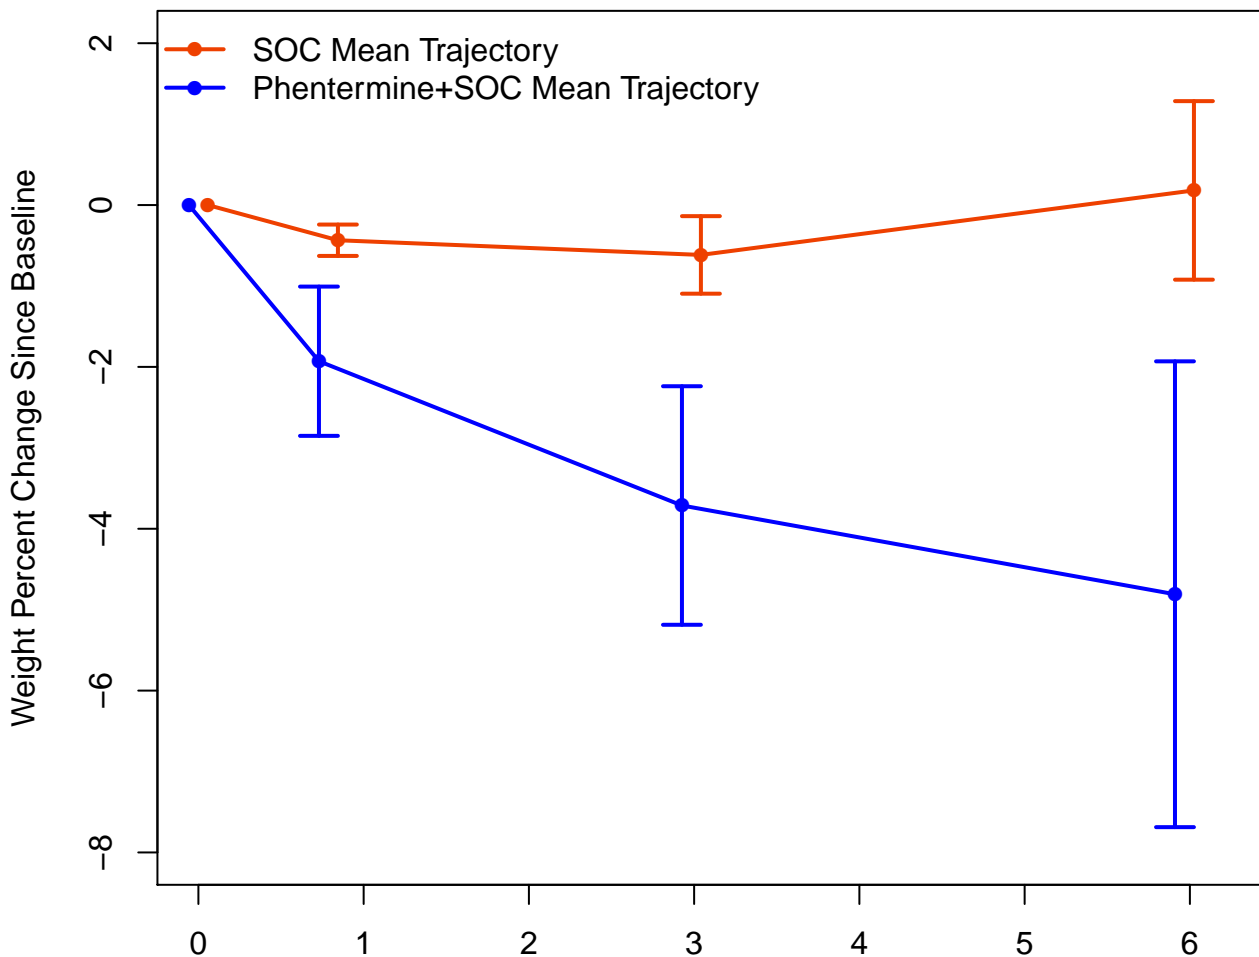

Sample Size (%)

Phen+SOC:

25 (100%)

Time (Months)

20 (80%)

11 (44%)

SOC:

274 (100%)

171 (62%)

96 (35%)

Supplement: NIHMS951646-supplement-Supplemental_Table_1.pdf [file NIHMS951646-supplement-Supplemental_Table_1.pdf]
